# Supplementary material for: Case of Human Infestation with Dermanyssus gallinae (Poultry Red Mite) from Swallows (Hirundinidae)
Source: MDPI journal article supplement (doi:10.3390/pathogens10030299), 2021-03-04
Supplement: s1 [file s1]

ΗΜΕΡΟΜΗΝΙΑ ΓΕΝΝΗΣΗΣ: ..... 14/01/1983 ..... ☒ άρρεν ☐ θήλυ  
ΕΠΑΓΓΕΛΜΑ: ..... ΓΕΩΠΟΝΟΣ Ζ.Π. ....  
ΠΕΡΙΟΧΗ (ΝΟΜΟΣ/ΠΟΛΗ/ΔΗΜΟΣ): ..... ΚΕΦΑΛΛΗΝΙΑΣ - ΑΡΓΟΣΤΟΛΙ .....  
ΗΜΕΡΟΜΗΝΙΑ ΣΥΜΠΗΡΩΣΗΣ ΤΟΥ ΕΡΩΤΗΜΑΤΟΛΟΓΙΟΥ: ..... 08/11/2020 .....

1. Ποιά περίοδο δεχθήκατε τσιμπήματα (μήνας - έτος);

Από ..... 15\05\2020 ..... έως ..... 20\06\2020 .....

2. Πόσα τσιμπήματα δεχθήκατε;

☐ μηδέν ☐ 1-5 ☐ 6-10 ☐ 10-20 ☒ >20

3. Σε ποιά σημεία δεχθήκατε τσιμπήματα;

☐ Κεφάλι ☒ Κορμός ☒ Άνω άκρα ☒ Κάτω άκρα

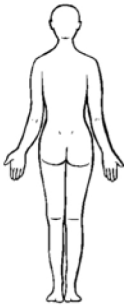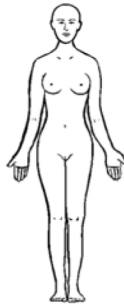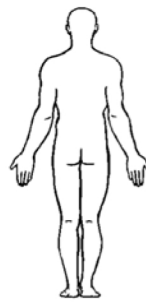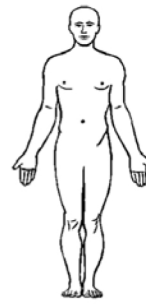

(σημειώστε)

4. Τι αντίδραση/συμπτώματα παρουσιάσατε μετά το τσίμπημα;

- ☐ καμία/κανένα  
☐ τοπική αντίδραση (<10cm)  
☐ μεγάλη τοπική αντίδραση (>10cm)  
☒ κνίδωση/αγγειοοίδημα  
☐ συστηματική αντίδραση [☐ δέρμα ☐ αναπνευστικό ☐ γαστρεντερικό ☐ καρδιαγγειακό]  
☐ επιπεφυκίτιδα ☐ ρινίτιδα ☐ άσθμα ☐ βήχας ☐ δύσπνοια ☐ συριγμός ☐ βράγχος φωνής  
☐ κνησμός ☐ παλαμών ☐ πελμάτων  
☐ ναυτία ☐ έμετος ☐ διάρροια ☐ κοιλιακό άλγος  
☐ ζάλη ☐ απώλεια αισθήσεων  
☐ άλλο (περιγράψτε) .....

5. Σε πόσο χρονικό διάστημα (min/h) μετά το τσίμπημα εμφανίστηκε η αντίδραση/τα συμπτώματα;

ΣΕ ΛΙΓΑ ΛΕΠΤΑ

6. Επισκεφτήκατε τα επείγοντα λόγω της αντίδρασης από το τσίμπημα;

☐ όχι ☒ ναι ποιά ήταν η αντιμετώπιση (φάρμακα/εισαγωγή/κλπ); ..... κορτιζονούχα αλοιφή .....

7. Έκτοτε έχετε υποστεί νέο τσίμπημα;

☒ όχι ☐ ναι πότε (ημερομηνία) .....

παρουσιάσατε αντίδραση μετά από αυτό το τσίμπημα; ☐ όχι ☐ ναι

8. Έχετε ιστορικό αλλεργικής ρινίτιδος/επιπεφυκίτιδος (καταρροή, πταρμούς, μπούκωμα, κνησμό σε μύτη/μάτια, δακρύρροια);

☒ όχι ☐ ναι [☐ εποχιακά τους μήνες ..... ☐ σχεδόν όλο τον χρόνο]

9. Έχετε ιστορικό

άσθματος (βήχας, βράσιμο, δύσπνοια, βάρος στο στήθος)

☒ όχι ☐ ναι [☐ δεν έχει ☐ έχει γίνει διάγνωση από γιατρό]

☐ δεν λαμβάνω ☐ λαμβάνω αντιασθματική αγωγή ☐ περιστασιακά ☐ συνεχώς]

ατοπικής δερματίτιδας (ξηροδερμία, έκζεμα)

☒ όχι ☐ ναι [☐ στην παιδική ηλικία ☐ στην ενήλικη ζωή]

αντίδρασης μετά από τσίμπημα μέλισσας/σφήκας

☒ όχι ☐ ναι προσδιορίστε ..... πότε (ημερομηνία) .....

αλλεργίας/υπερευαισθησίας σε τροφή;

☒ όχι ☐ ναι προσδιορίστε τροφή .....

Συμπτώματα ☐ κνησμός σε στόμα, χείλη, φάρυγγα

☐ συστηματική αντίδραση

αλλεργίας/υπερευαισθησίας σε φάρμακα

☒ όχι ☐ ναι προσδιορίστε φάρμακο(α) .....

10. Παρουσιάζετε κνησμό, βήχα, ρινίτιδα κατά την χρήση προϊόντων από λάστιχο (γάντια, προφυλακτικά, μπαλόνια, κ.ά.);

☒ όχι ☐ ναι προσδιορίστε σύμπτωμα .....

☐ άμεσα ☐ μετά από .....ώρες

11. Έχετε παρουσιάσει επεισόδια με εξάνθημα ή πρήξιμο σε χείλη, βλέφαρα, κ.ά.;

☒ όχι ☐ ναι προσδιορίστε .....

12. Έχετε συγγενή 1ου βαθμού με ιστορικό αλλεργίας/ατοπίας;

☒ όχι ☐ ναι προσδιορίστε .....

13. Λαμβάνετε κάποια φάρμακα;

☒ όχι ☐ ναι προσδιορίστε (σκεύασμα) .....

14. Έχετε κάποιο πρόβλημα υγείας;

☒ όχι ☐ ναι προσδιορίστε .....
